# Supplementary material
Source: Springer Nature journal article supplement (https://www.springermedizin.de/resource/supplementary/12968_2012_3267_MOESM4_ESM.pdf/9583512)

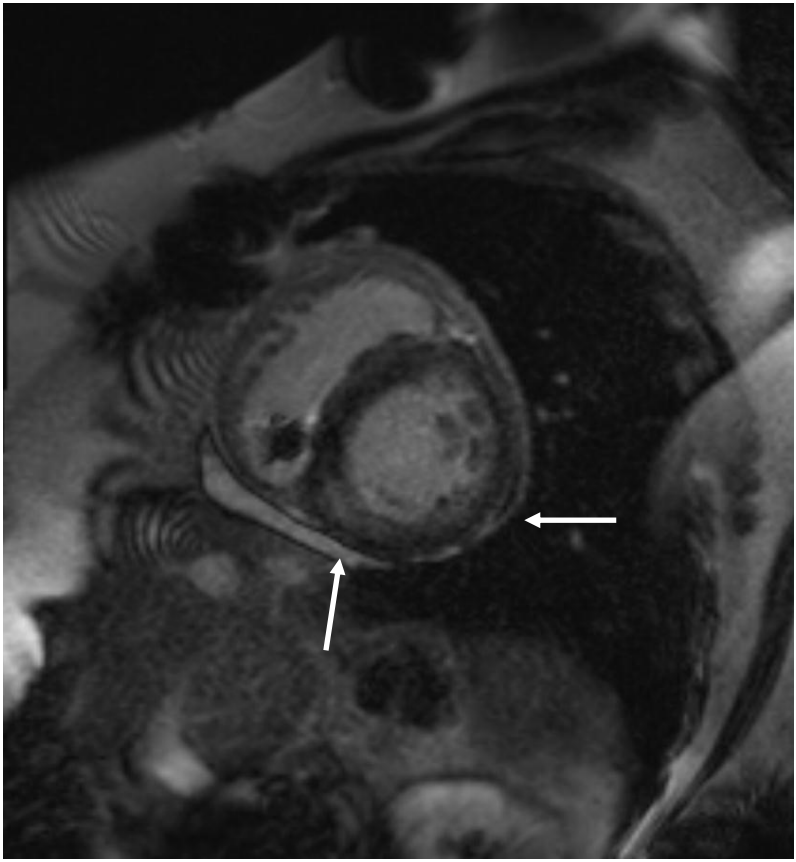

Supplement: MOESM4 [file 9583512]
